# Supplementary material for: Simultaneous current generation and ammonia recovery from real urine using nitrogen-purged bioelectrochemical systems
Source: Royal Society of Chemistry journal article supplement (doi:10.1039/c5ra11556f), 2015-01-01
Supplement: c5ra11556f1.pdf [file c5ra11556f1.pdf]

## Materials and Methods

### Electrochemical analysis

Cyclic voltammetry (CV) was performed on the anode of the CC and CN reactors with cathode as the counter electrode, relative to the Ag/AgCl reference electrode. The potential was scanned positively from -0.7 V to 0.2 V at which point the scan direction was reversed. Scan was operated at a rate of 5 mV using a potentiostat/galvanostat (Autolab, Metrohm, model PGSTAT 128N). Once a stable current was achieved in one batch cycle, the reactor was disconnected from the data acquisition system, emptied and refilled with same fresh urine before analysis.

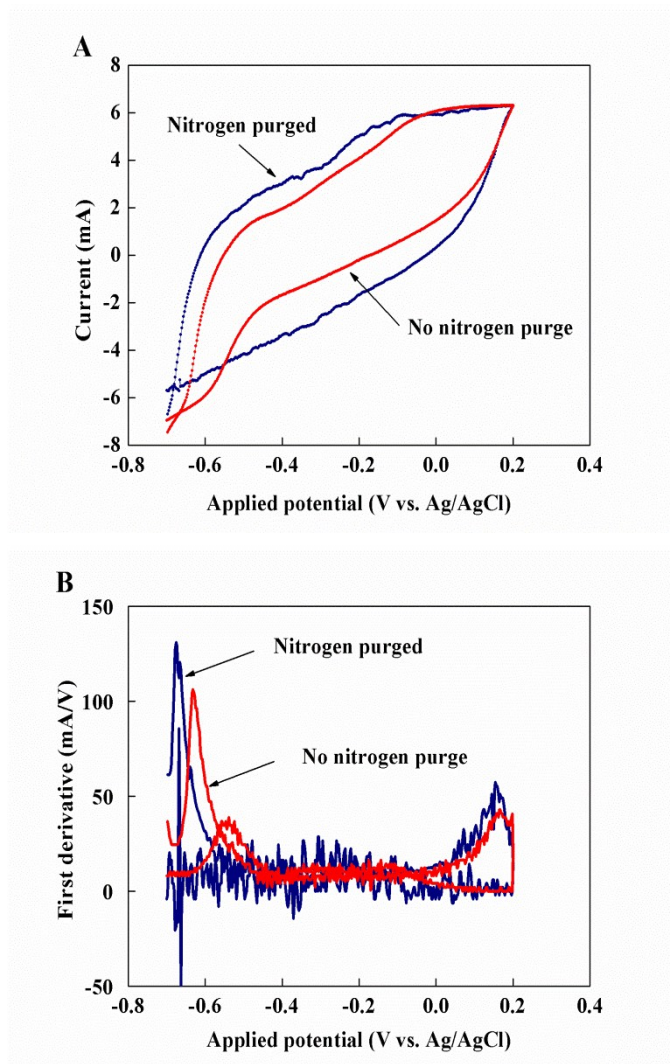

**Fig.S1** (A) Cyclic voltammograms and (B) first derivative of cyclic voltammograms of anode biofilms developed in the CC and CN reactors.

**Table S1.** Various estimators for evaluation of community diversity and richness

| Electrode type | Reads | OTUs | Good's coverage | Shannon index |
|----------------|-------|------|-----------------|---------------|
| A-OC           | 6080  | 1533 | 0.85            | 5.89          |
| A-CC           | 14850 | 1717 | 0.94            | 5.24          |
| A-CN           | 11204 | 1218 | 0.94            | 4.67          |
| C-OC           | 65513 | 3172 | 0.97            | 4.68          |

|      |       |      |      |      |
|------|-------|------|------|------|
| C-CC | 58134 | 3199 | 0.97 | 4.86 |
| C-CN | 72044 | 2955 | 0.98 | 4.84 |

Table S2 Key components measured in real urine

| Components | Na <sup>+</sup> | K <sup>+</sup> | Mg <sup>2+</sup> | PO <sub>4</sub> <sup>3-</sup> -P |
|------------|-----------------|----------------|------------------|----------------------------------|
| Unit       |                 |                | mg/L             |                                  |
| Value      | 1511            | 482            | 19               | 151                              |
